# Supplementary material for: RNA-Seq Analysis Reveals CCR5 as a Key Target for CRISPR Gene Editing to Regulate In Vivo NK Cell Trafficking
Source: PubMed Central journal article supplement (PMC7922167; doi:10.3390/cancers13040872), 2021-02-19

# RNA-Seq Analysis Reveals CCR5 as a Key Target for CRISPR Gene Editing to Regulate NK Cell Trafficking In Vivo

Emily R. Levy, Joseph A. Clara, Robert N. Reger, David S.J. Allan and Richard W. Childs

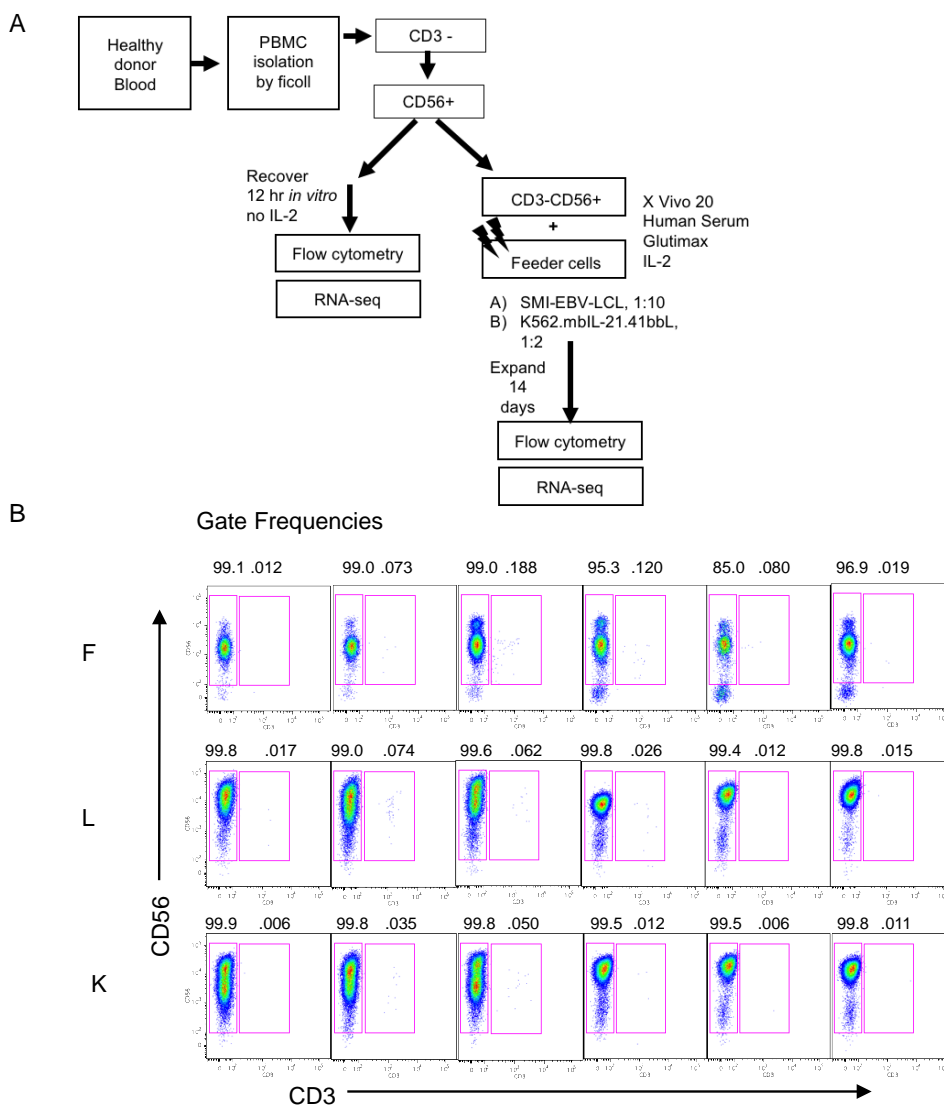

**Figure S1.** (A) Experiment outline of analyzing transcriptional and phenotypic changes in NK cells due to ex vivo expansion with feeder cells. (B) The frequency of viable CD56<sup>+</sup>CD3<sup>-</sup> cells and CD3 contamination within the samples that were utilized for phenotype and RNA-seq experiments. Fresh (F) NK cells were isolated from healthy donor buffy coats ( $n = 6$ ) and then expanded with either EBV-LCL (L) or GE-K562 (K) feeder cells.

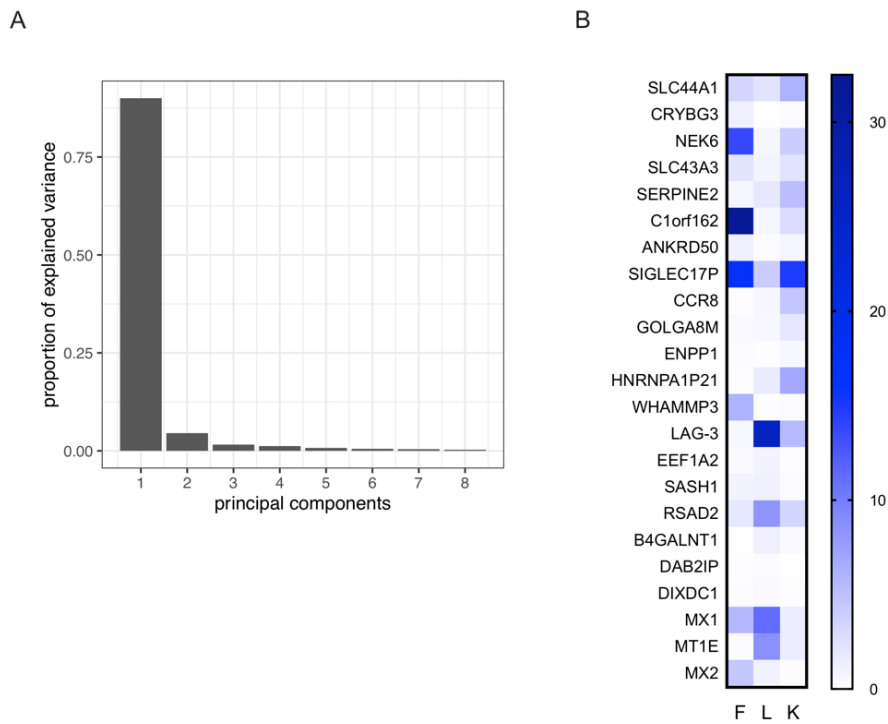

**Figure S2.** (A) Scree plot for PCA of the RNA-sequenced NK cell populations. (B) Heat map representing differential expression of significant DEGs between LCL and GE-K562 expanded NK cells (FPKM).

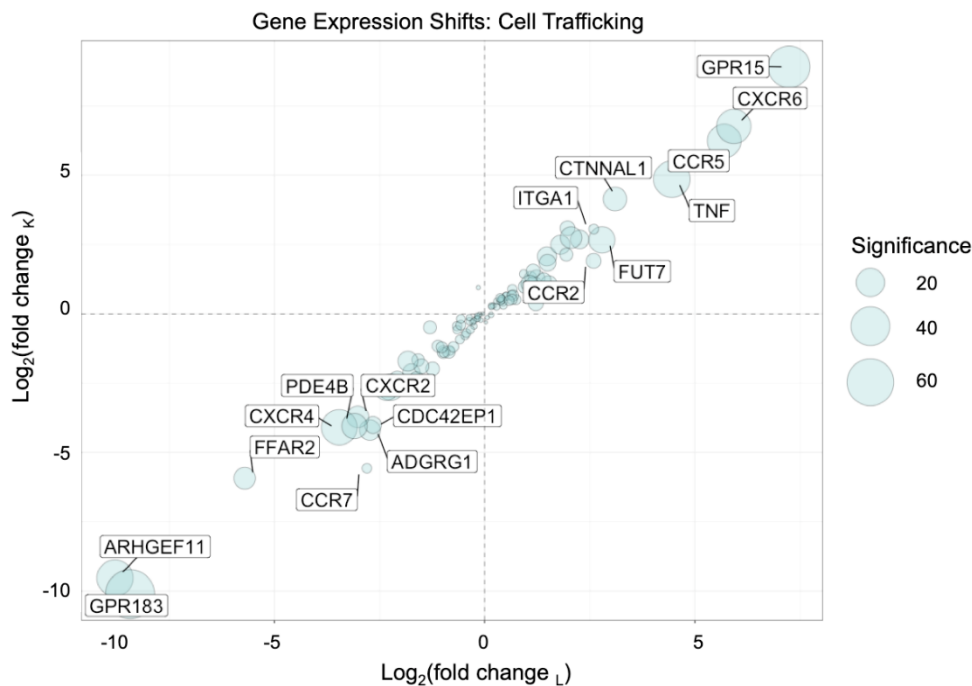

**Figure S3.** Bubble plots that displays genes that are included in supplemental Table 1; graphical organization is the same as in Figure 2A. The genes that are labeled have a  $\log_2(\text{fold change})$  value of  $>3$  or  $<-3$ . Significance is reported as  $-\log_{10}(\text{adjusted } p \text{ value})$ .

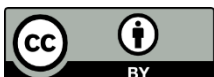

Supplement: cancers-13-00872-s001.pdf [file cancers-13-00872-s001.pdf]
